# Supplementary material for: Phase matrix characterization of long-range-transported Saharan dust using multiwavelength-polarized polar imaging nephelometry
Source: Copernicus journal article supplement (doi:10.5194/acp-25-6325-2025), 2025-06-26
Supplement: Supplementary file 1 [file acp-25-6325-2025-supplement.pdf]

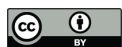

*Supplement of*

## **Phase matrix characterization of long-range-transported Saharan dust using multiwavelength-polarized polar imaging nephelometry**

**Elena Bazo et al.**

*Correspondence to:* Daniel Pérez-Ramírez ([dperez@ugr.es](mailto:dperez@ugr.es))

The copyright of individual parts of the supplement might differ from the article licence.

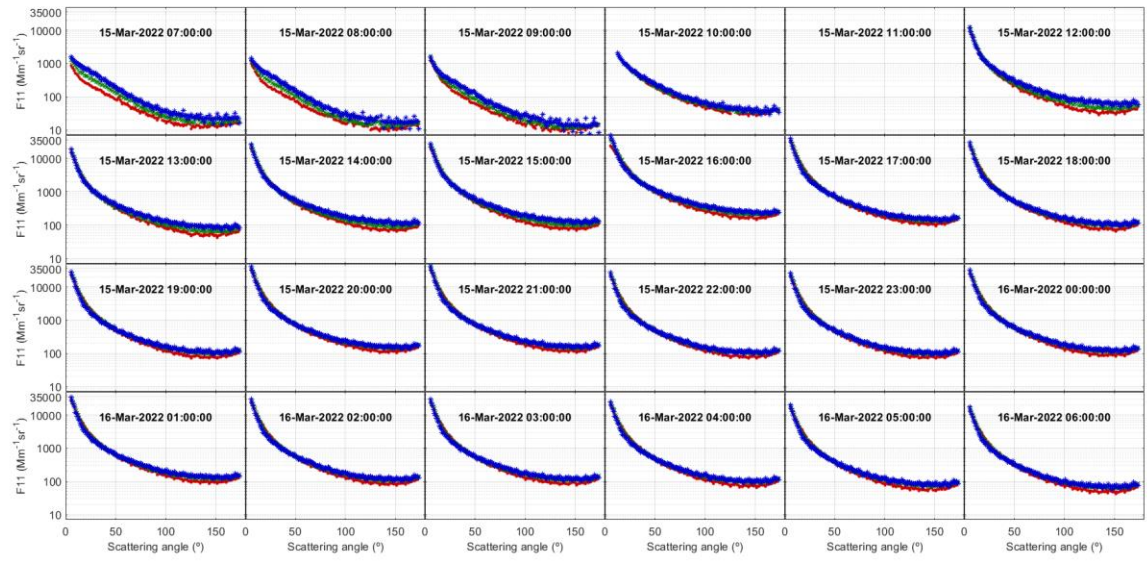

Figure S1. Temporal evolution of the 60-minute average of  $F_{11}$  during the dust event on March 15<sup>th</sup> - 16<sup>th</sup>.

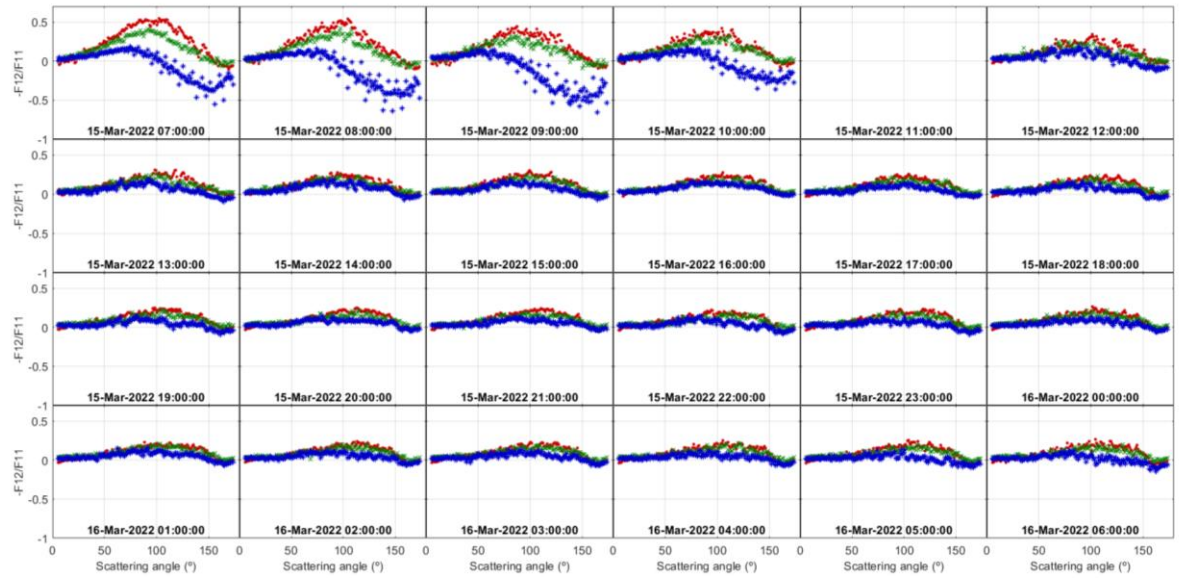

Figure S2. Temporal evolution of the 60-minute average of  $-F_{12}/F_{11}$  during the dust event on March 15<sup>th</sup> - 16<sup>th</sup>.

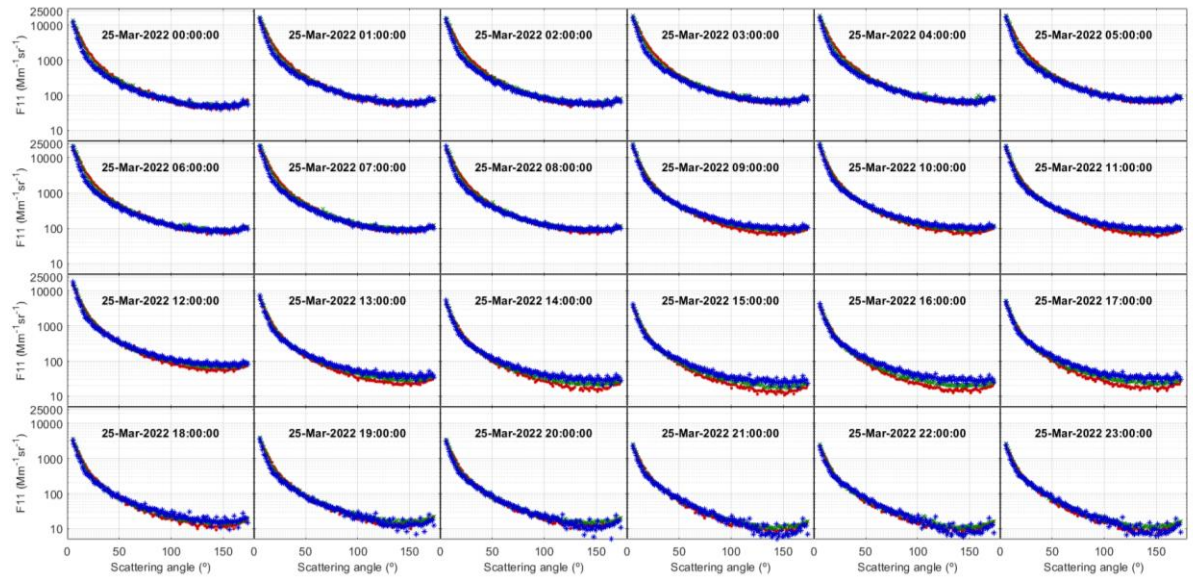

Figure S3. Temporal evolution of the 60-minute average of  $F_{11}$  during the dust event on March 24<sup>th</sup> - 25<sup>th</sup>.

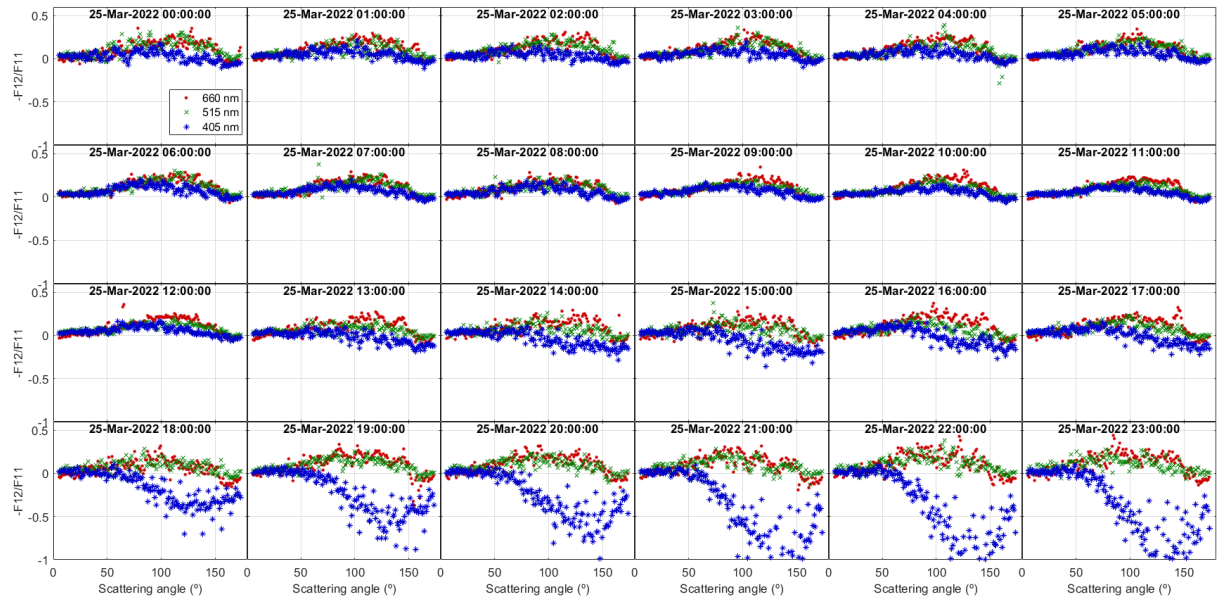

Figure S4. Temporal evolution of the 60-minute average of  $-F_{12}/F_{11}$  during the dust event on March 24<sup>th</sup> - 25<sup>th</sup>.
